# Supplementary material for: Sex Differences in the Association Between Hypertension and Incident Atrial Fibrillation
Source: PubMed Central journal article supplement — J Am Heart Assoc. 2023 Feb 21;12(5):e026240. doi: 10.1161/JAHA.122.026240 (PMC10111461; doi:10.1161/jaha.122.026240), 2023-02-21
Supplement: JAH3-12-e026240-s001.pdf [file JAH3-12-e026240-s001.pdf]

## **SUPPLEMENTAL MATERIAL**

### **Data S1. Methods of Blood Pressure Measurement**

- 1.** The auscultation method should use an accurately calibrated mercury or aneroid sphygmomanometer. A calibrated electronic sphygmomanometer can also be used.
- 2.** Healthcare professionals should choose the correct cuff size and wrap the cuff around the arm, with the center of the cuff bladder over the brachial artery. The stethoscope, standard sphygmomanometers, and cuff and bulb should be checked regularly to ensure that BP measurements have a standardized high level of accuracy and precision. The appropriate BP cuff size should be determined by measuring the participant's arm circumference at the mid-point between the acromion and olecranon. A cuff with a bladder 13 cm wide and 22–24 cm long should be used for the auscultation method. A pediatric cuff should be used for a brachial girth less than 27 cm, and a large adult cuff for an arm girth  $\geq 34$  cm.
- 3.** Caffeine, eating, heavy physical activity, smoking, and talking should be avoided before measurement.
- 4.** Research staff should measure right-arm brachial artery blood pressure two times after the participant had been sitting in a quiet room for 5 minutes in a seated position on a chair with back support and the participant's legs uncrossed. The inner aspect of the bend at the elbow (cubital fossa) should be maintained at heart level.
- 5.** Measurement: The cuff should rapidly be inflated while palpating the radial or brachial artery, and the stethoscope should be applied once the pressure in the blood pressure cuff has risen to 20-30 mmHg or more above the level at which the radial (or brachial) arterial pulse is no longer palpable. Then, the cuff should be slowly deflated (2 mmHg per second). Staff should record the 1st and 5th Korotkoff sounds, rounding the pressure in mmHg to the nearest even number and recording it.
- 6.** The measurements should be performed two times at an interval of  $\geq 1$  min, and the mean value of two measurements that provide stable values (difference in the values:  $< 5$  mmHg) should be used for the analyses.

**Table S1. Alternative Blood Pressure Categorization and Atrial Fibrillation Stratified by Sex**

|                                | Men                |                                 |                                |                                 | Women              |                                 |                                |                                 | P for interaction |
|--------------------------------|--------------------|---------------------------------|--------------------------------|---------------------------------|--------------------|---------------------------------|--------------------------------|---------------------------------|-------------------|
|                                | Normal/Elevated BP | Isolated Diastolic Hypertension | Isolated Systolic Hypertension | Systolic Diastolic Hypertension | Normal/Elevated BP | Isolated Diastolic Hypertension | Isolated Systolic Hypertension | Systolic Diastolic Hypertension |                   |
| No. of Individuals             | 1,187,598          | 278,915                         | 94,058                         | 383,137                         | 1,138,541          | 107,489                         | 52,192                         | 141,808                         | -----             |
| No. of Events                  | 4,816              | 1,868                           | 620                            | 3,297                           | 1,716              | 266                             | 178                            | 502                             | -----             |
| Incidence (10000 person-years) | 11.9 (11.6-12.3)   | 18.5 (17.7-19.3)                | 19.5 (18.0-21.1)               | 24.5 (23.7-25.3)                | 4.9 (4.7-5.2)      | 8.3 (7.4-9.4)                   | 11.1 (9.6-12.9)                | 12.0 (11.0-13.0)                | -----             |
| Model 1                        | 1 [Reference]      | 1.54 (1.46-1.63)                | 1.62 (1.49-1.77)               | 2.04 (1.95-2.13)                | 1 [Reference]      | 1.69 (1.48-1.92)                | 2.24 (1.92-2.62)               | 2.42 (2.19-2.68)                | 0.0002            |
| Model 2                        | 1 [Reference]      | 1.24 (1.17-1.30)                | 1.36 (1.25-1.48)               | 1.41 (1.35-1.48)                | 1 [Reference]      | 1.39 (1.22-1.58)                | 1.38 (1.18-1.62)               | 1.60 (1.45-1.77)                | 0.0894            |
| Model 3                        | 1 [Reference]      | 1.19 (1.12-1.25)                | 1.31 (1.20-1.42)               | 1.31 (1.25-1.38)                | 1 [Reference]      | 1.38 (1.21-1.57)                | 1.37 (1.17-1.60)               | 1.57 (1.42-1.75)                | 0.0097            |

Model 1=Unadjusted Model. Model 2=Adjusted for age. Model 3=Adjusted for age, body mass index, diabetes mellitus, dyslipidemia, cigarette smoking, and alcohol consumption.

**Table S2. Subgroup Analysis of Alternative Blood Pressure Categorization and Atrial Fibrillation Stratified by Sex****Age ≥ 50 years**

|                                | Men                |                                 |                                |                                 | Women              |                                 |                                |                                 | P for interaction |
|--------------------------------|--------------------|---------------------------------|--------------------------------|---------------------------------|--------------------|---------------------------------|--------------------------------|---------------------------------|-------------------|
|                                | Normal/Elevated BP | Isolated Diastolic Hypertension | Isolated Systolic Hypertension | Systolic Diastolic Hypertension | Normal/Elevated BP | Isolated Diastolic Hypertension | Isolated Systolic Hypertension | Systolic Diastolic Hypertension |                   |
| No. of Individuals             | 263,019            | 100,875                         | 28,015                         | 173,059                         | 276,587            | 40,512                          | 30,943                         | 79,496                          | -----             |
| No. of Events                  | 2,559              | 1,107                           | 411                            | 2,198                           | 796                | 144                             | 130                            | 345                             | -----             |
| Incidence (10000 person-years) | 27.8 (26.7-28.9)   | 31.4 (29.6-33.3)                | 44.7 (40.5-49.2)               | 38.2 (36.7-39.9)                | 9.8 (9.2-10.6)     | 12.4 (10.6-14.6)                | 15.3 (12.8-18.1)               | 15.8 (14.2-17.6)                | -----             |
| Model 1                        | 1 [Reference]      | 1.13 (1.05-1.21)                | 1.61 (1.45-1.78)               | 1.38 (1.30-1.46)                | 1 [Reference]      | 1.27 (1.06-1.51)                | 1.55 (1.29-1.87)               | 1.61 (1.42-1.83)                | 0.1023            |
| Model 2                        | 1 [Reference]      | 1.16 (1.09-1.25)                | 1.36 (1.23-1.51)               | 1.31 (1.24-1.39)                | 1 [Reference]      | 1.27 (1.06-1.52)                | 1.24 (1.03-1.50)               | 1.46 (1.29-1.66)                | 0.2354            |
| Model 3                        | 1 [Reference]      | 1.13 (1.05-1.21)                | 1.32 (1.18-1.46)               | 1.24 (1.17-1.31)                | 1 [Reference]      | 1.25 (1.05-1.49)                | 1.22 (1.01-1.47)               | 1.41 (1.24-1.61)                | 0.1615            |

**Age < 50 years**

|                                | Men                |                                 |                                |                                 | Women              |                                 |                                |                                 | P for interaction |
|--------------------------------|--------------------|---------------------------------|--------------------------------|---------------------------------|--------------------|---------------------------------|--------------------------------|---------------------------------|-------------------|
|                                | Normal/Elevated BP | Isolated Diastolic Hypertension | Isolated Systolic Hypertension | Systolic Diastolic Hypertension | Normal/Elevated BP | Isolated Diastolic Hypertension | Isolated Systolic Hypertension | Systolic Diastolic Hypertension |                   |
| No. of Individuals             | 924,579            | 178,040                         | 66,043                         | 210,078                         | 861,954            | 66,977                          | 21,249                         | 62,312                          | -----             |
| No. of Events                  | 2,257              | 761                             | 209                            | 1,099                           | 920                | 122                             | 48                             | 157                             | -----             |
| Incidence (10000 person-years) | 7.2 (7.0-7.6)      | 11.6 (10.8-12.4)                | 9.3 (8.1-10.6)                 | 14.2 (13.4-15.1)                | 3.5 (3.2-3.7)      | 6.0 (5.0-7.2)                   | 6.4 (4.8-8.5)                  | 7.8 (6.7-9.1)                   | -----             |
| Model 1                        | 1 [Reference]      | 1.57 (1.45-1.70)                | 1.25 (1.08-1.44)               | 1.91 (1.78-2.06)                | 1 [Reference]      | 1.74 (1.44-2.10)                | 1.81 (1.35-2.42)               | 2.24 (1.89-2.65)                | 0.0581            |
| Model 2                        | 1 [Reference]      | 1.31 (1.20-1.42)                | 1.36 (1.18-1.57)               | 1.58 (1.47-1.70)                | 1 [Reference]      | 1.57 (1.30-1.90)                | 1.60 (1.20-2.14)               | 1.89 (1.59-2.24)                | 0.1053            |

|         |               |                     |                     |                     |               |                     |                     |                     |        |
|---------|---------------|---------------------|---------------------|---------------------|---------------|---------------------|---------------------|---------------------|--------|
| Model 3 | 1 [Reference] | 1.24<br>(1.14-1.35) | 1.29<br>(1.12-1.48) | 1.43<br>(1.32-1.54) | 1 [Reference] | 1.58<br>(1.31-1.92) | 1.62<br>(1.21-2.17) | 1.91<br>(1.59-2.28) | 0.0068 |
|---------|---------------|---------------------|---------------------|---------------------|---------------|---------------------|---------------------|---------------------|--------|

---

Model 1=Unadjusted Model. Model 2=Adjusted for age. Model 3=Adjusted for age, body mass index, diabetes mellitus, dyslipidemia, cigarette smoking, and alcohol consumption.

**Table S3. Blood Pressure Category and Atrial Fibrillation Stratified by Sex including individuals with taking antihypertensive medications**

|                                | Men                   |                         |                      |                      | Women                 |                         |                      |                      | P for interaction |
|--------------------------------|-----------------------|-------------------------|----------------------|----------------------|-----------------------|-------------------------|----------------------|----------------------|-------------------|
|                                | Normal Blood Pressure | Elevated Blood Pressure | Stage 1 Hypertension | Stage 2 Hypertension | Normal Blood Pressure | Elevated Blood Pressure | Stage 1 Hypertension | Stage 2 Hypertension |                   |
| No. of Individuals             | 886,696               | 362,403                 | 570,015              | 335,554              | 992,612               | 180,759                 | 228,589              | 129,025              | -----             |
| No. of Events                  | 3,857                 | 1,903                   | 4,424                | 3,891                | 1,464                 | 464                     | 711                  | 590                  | -----             |
| Incidence (10000 person-years) | 12.8<br>(12.4-13.2)   | 15.7<br>(15.0-16.4)     | 21.7<br>(21.1-22.4)  | 34.3<br>(33.3-35.4)  | 4.9<br>(4.6-5.1)      | 8.4<br>(7.7-9.2)        | 10.3<br>(9.5-11.0)   | 16.2<br>(14.9-17.5)  | -----             |
| Model 1                        | 1 [Reference]         | 1.23<br>(1.16-1.30)     | 1.70<br>(1.62-1.77)  | 2.69<br>(2.57-2.81)  | 1 [Reference]         | 1.73<br>(1.55-1.92)     | 2.11<br>(1.93-2.31)  | 3.35<br>(3.04-3.69)  | <0.001            |
| Model 2                        | 1 [Reference]         | 1.15<br>(1.09-1.22)     | 1.28<br>(1.23-1.34)  | 1.68<br>(1.61-1.76)  | 1 [Reference]         | 1.27<br>(1.14-1.41)     | 1.41<br>(1.29-1.55)  | 1.85<br>(1.68-2.05)  | 0.1525            |
| Model 3                        | 1 [Reference]         | 1.11<br>(1.05-1.17)     | 1.20<br>(1.15-1.26)  | 1.52<br>(1.45-1.60)  | 1 [Reference]         | 1.24<br>(1.12-1.38)     | 1.38<br>(1.25-1.51)  | 1.78<br>(1.60-1.93)  | 0.0175            |
| Model 4                        | 1 [Reference]         | 1.09<br>(1.03-1.15)     | 1.16<br>(1.11-1.22)  | 1.45<br>(1.39-1.52)  | 1 [Reference]         | 1.22<br>(1.10-1.36)     | 1.31<br>(1.19-1.44)  | 1.64<br>(1.47-1.82)  | 0.0694            |

Model 1=Unadjusted Model. Model 2=Adjusted for age. Model 3=Adjusted for age, body mass index, diabetes mellitus, dyslipidemia, cigarette smoking, and alcohol consumption. Model 4=Adjusted for age, body mass index, diabetes mellitus, dyslipidemia, cigarette smoking, alcohol consumption, and the presence of antihypertensive medications.

**Table S4. Blood Pressure Category and Atrial Fibrillation Stratified by Sex after Multiple Imputations**

|                                | Men                   |                         |                      |                      | Women                 |                         |                      |                      | P for interaction |
|--------------------------------|-----------------------|-------------------------|----------------------|----------------------|-----------------------|-------------------------|----------------------|----------------------|-------------------|
|                                | Normal Blood Pressure | Elevated Blood Pressure | Stage 1 Hypertension | Stage 2 Hypertension | Normal Blood Pressure | Elevated Blood Pressure | Stage 1 Hypertension | Stage 2 Hypertension |                   |
| No. of Individuals             | 1,023,634             | 411,638                 | 585,119              | 311,154              | 1,115,074             | 192,088                 | 227,479              | 115,207              | -----             |
| No. of Events                  | 3,939                 | 1,800                   | 3,808                | 3,179                | 1,565                 | 439                     | 597                  | 476                  | -----             |
| Incidence (10000 person-years) | 10.7 (10.4-11.1)      | 12.3 (11.7-12.9)        | 17.2 (16.7-17.8)     | 28.7 (27.8-29.8)     | 4.5 (4.3-4.7)         | 7.2 (6.6-7.9)           | 8.4 (7.7-9.1)        | 14.2 (13.0-15.6)     | -----             |
| Model 1                        | 1 [Reference]         | 1.14 (1.08-1.20)        | 1.59 (1.52-1.66)     | 2.67 (2.55-2.80)     | 1 [Reference]         | 1.60 (1.44-1.78)        | 1.86 (1.69-2.04)     | 3.18 (2.87-3.52)     | <0.001            |
| Model 2                        | 1 [Reference]         | 1.14 (1.07-1.20)        | 1.25 (1.19-1.31)     | 1.71 (1.63-1.80)     | 1 [Reference]         | 1.24 (1.11-1.38)        | 1.32 (1.20-1.46)     | 1.89 (1.70-2.11)     | 0.1433            |
| Model 3                        | 1 [Reference]         | 1.10 (1.04-1.17)        | 1.19 (1.13-1.24)     | 1.58 (1.50-1.66)     | 1 [Reference]         | 1.24 (1.11-1.38)        | 1.31 (1.19-1.45)     | 1.87 (1.68-2.09)     | 0.0259            |

Model 1=Unadjusted Model. Model 2=Adjusted for age. Model 3=Adjusted for age, body mass index, diabetes mellitus, dyslipidemia, cigarette smoking, and alcohol consumption.

**Table S5. Blood Pressure Category and Atrial Fibrillation Stratified by Sex using the cause-specific Cox proportional hazard modeling**

|                                | Men                   |                         |                      |                      | Women                 |                         |                      |                      | P for interaction |
|--------------------------------|-----------------------|-------------------------|----------------------|----------------------|-----------------------|-------------------------|----------------------|----------------------|-------------------|
|                                | Normal Blood Pressure | Elevated Blood Pressure | Stage 1 Hypertension | Stage 2 Hypertension | Normal Blood Pressure | Elevated Blood Pressure | Stage 1 Hypertension | Stage 2 Hypertension |                   |
| No. of Individuals             | 851,494               | 336,104                 | 491,293              | 264,817              | 971,120               | 167,421                 | 199,296              | 102,193              | -----             |
| No. of Events                  | 3,326                 | 1,490                   | 3,160                | 2,625                | 1,345                 | 371                     | 532                  | 414                  | -----             |
| Incidence (10000 person-years) | 11.4 (11.1-11.8)      | 13.2 (12.6-13.9)        | 17.8 (17.2-18.4)     | 29.1 (28.0-30.3)     | 4.6 (4.3-4.8)         | 7.2 (6.5-8.0)           | 8.7 (8.0-9.5)        | 14.3 (13.0-15.7)     | -----             |
| Model 1                        | 1 [Reference]         | 1.15 (1.08-1.23)        | 1.54 (1.47-1.62)     | 2.54 (2.41-2.67)     | 1 [Reference]         | 1.57 (1.40-1.77)        | 1.91 (1.73-2.12)     | 3.16 (2.83-3.53)     | <0.001            |
| Model 2                        | 1 [Reference]         | 1.13 (1.06-1.20)        | 1.23 (1.17-1.29)     | 1.68 (1.59-1.76)     | 1 [Reference]         | 1.22 (1.08-1.37)        | 1.38 (1.24-1.52)     | 1.91 (1.70-2.14)     | 0.1066            |
| Model 3                        | 1 [Reference]         | 1.10 (1.03-1.17)        | 1.17 (1.11-1.23)     | 1.55 (1.47-1.63)     | 1 [Reference]         | 1.22 (1.08-1.37)        | 1.37 (1.23-1.52)     | 1.89 (1.68-2.12)     | 0.0076            |

Model 1=Unadjusted Model. Model 2=Adjusted for age. Model 3=Adjusted for age, body mass index, diabetes mellitus, dyslipidemia, cigarette smoking, and alcohol consumption.

**Table S6. Blood Pressure Category and Atrial Fibrillation Stratified by Sex after additional adjustment for use of sex hormones and modulators of the genital system medications**

|                                | Men                   |                         |                      |                      | Women                 |                         |                      |                      | P for interaction |
|--------------------------------|-----------------------|-------------------------|----------------------|----------------------|-----------------------|-------------------------|----------------------|----------------------|-------------------|
|                                | Normal Blood Pressure | Elevated Blood Pressure | Stage 1 Hypertension | Stage 2 Hypertension | Normal Blood Pressure | Elevated Blood Pressure | Stage 1 Hypertension | Stage 2 Hypertension |                   |
| No. of Individuals             | 851,494               | 336,104                 | 491,293              | 264,817              | 971,120               | 167,421                 | 199,296              | 102,193              | -----             |
| No. of Events                  | 3,326                 | 1,490                   | 3,160                | 2,625                | 1,345                 | 371                     | 532                  | 414                  | -----             |
| Incidence (10000 person-years) | 11.4<br>(11.1-11.8)   | 13.2<br>(12.6-13.9)     | 17.8<br>(17.2-18.4)  | 29.1<br>(28.0-30.3)  | 4.6<br>(4.3-4.8)      | 7.2<br>(6.5-8.0)        | 8.7<br>(8.0-9.5)     | 14.3<br>(13.0-15.7)  | -----             |
| Model 1                        | 1 [Reference]         | 1.15<br>(1.08-1.23)     | 1.54<br>(1.47-1.62)  | 2.54<br>(2.41-2.67)  | 1 [Reference]         | 1.57<br>(1.40-1.77)     | 1.91<br>(1.73-2.12)  | 3.16<br>(2.83-3.53)  | <0.001            |
| Model 2                        | 1 [Reference]         | 1.13<br>(1.06-1.20)     | 1.23<br>(1.17-1.29)  | 1.68<br>(1.59-1.76)  | 1 [Reference]         | 1.22<br>(1.09-1.37)     | 1.38<br>(1.24-1.52)  | 1.91<br>(1.70-2.14)  | 0.1525            |
| Model 3                        | 1 [Reference]         | 1.10<br>(1.03-1.17)     | 1.17<br>(1.11-1.23)  | 1.55<br>(1.47-1.63)  | 1 [Reference]         | 1.22<br>(1.08-1.37)     | 1.37<br>(1.23-1.52)  | 1.89<br>(1.68-2.13)  | 0.0073            |

The association between blood pressure category and atrial fibrillation stratified by sex is summarized. The incidence is presented in in 10000 person-years. Model 1=Unadjusted Model. Model 2=Adjusted for age. Model 3=Adjusted for age, body mass index, diabetes mellitus, dyslipidemia, cigarette smoking, alcohol consumption, and use of sex hormones and modulators of the genital system medications.
